# Supplementary material for: Indexing Permafrost Soil Organic Matter Degradation Using High-Resolution Mass Spectrometry
Source: PubMed Central journal article supplement (PMC4467038; doi:10.1371/journal.pone.0130557), 2015-06-12
Supplement: pone.0130557.s002.pdf [file pone.0130557.s002.pdf]

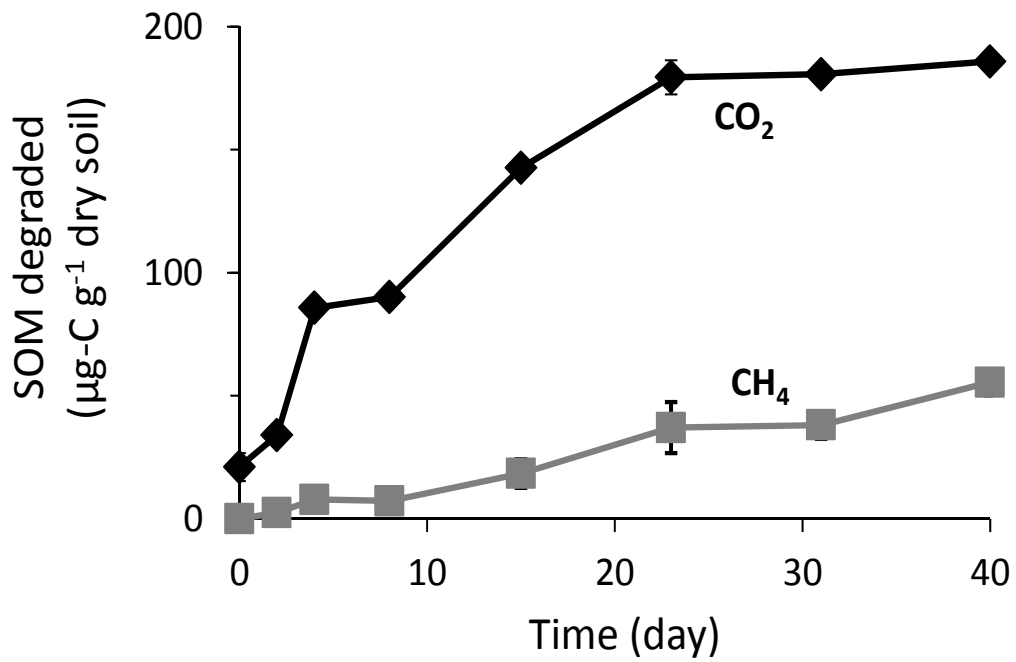

**Figure S2.** Cumulative gas production (carbon dioxide ( $\text{CO}_2$ ) and methane ( $\text{CH}_4$ )) during a simulated 40-day warming incubation experiment with an Arctic mineral soil obtained from Barrow, Alaska, USA.
