# Supplementary material for: Indexing Permafrost Soil Organic Matter Degradation Using High-Resolution Mass Spectrometry
Source: PubMed Central journal article supplement (PMC4467038; doi:10.1371/journal.pone.0130557), 2015-06-12
Supplement: pone.0130557.s003.pdf [file pone.0130557.s003.pdf]

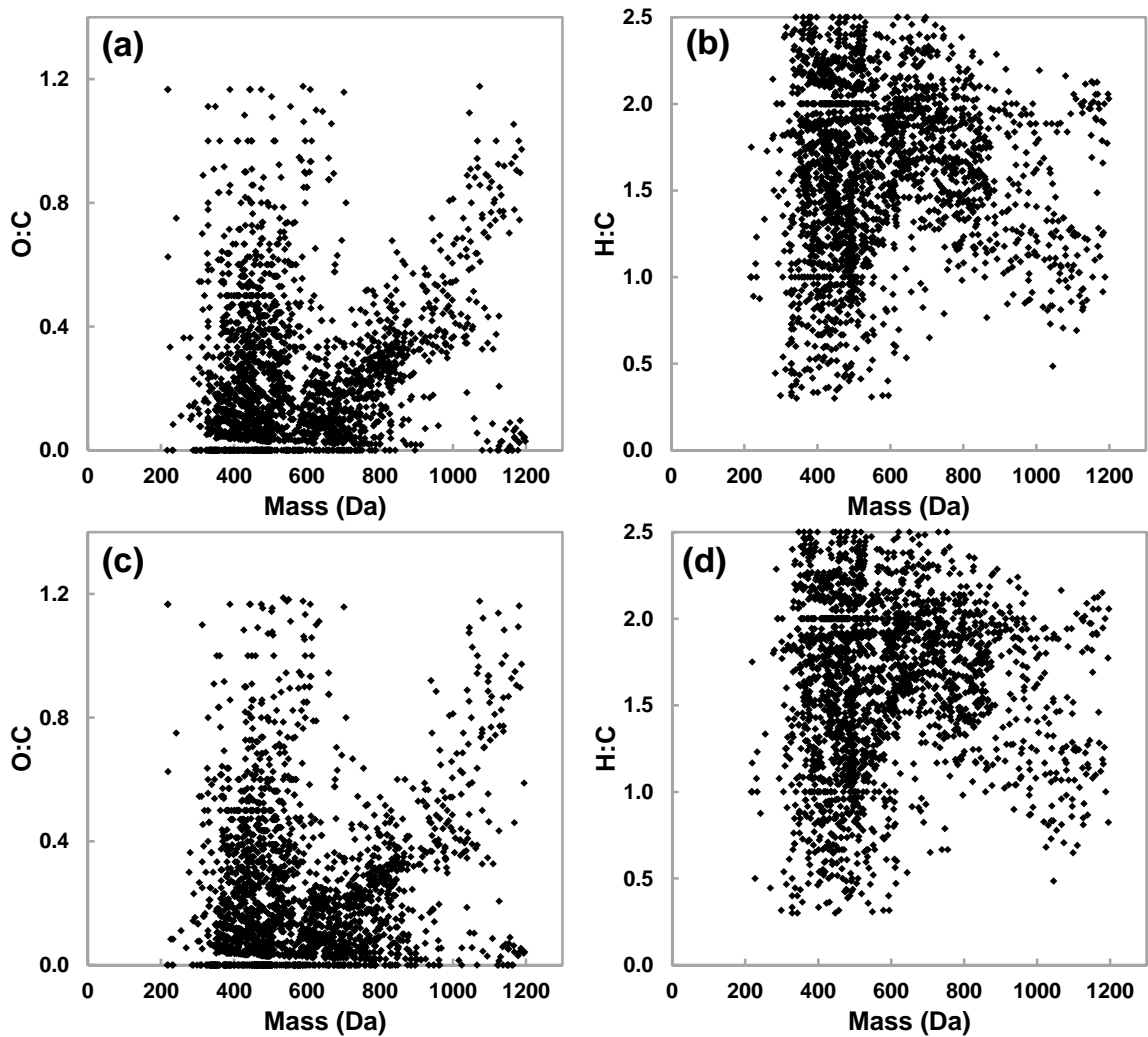

**Figure S3.** Plots of O:C vs. mass and H:C vs. mass for BSF0 (a,b) and BSF40 (c,d) SOM samples. Distributions of O:C and H:C as functions of mass for the BSF reveal a positive correlation between O:C and mass and a simultaneous negative correlation between H:C and mass above  $m/z$  600 in the BSF.
